# Supplementary material for: ESCRT recruitment to mRNA-encoded SARS-CoV-2 spike induces virus-like particles and enhanced antibody responses
Source: PubMed Central journal article supplement — bioRxiv. 2022 Dec 27:2022.12.26.521940. Preprint. [Version 1] doi: 10.1101/2022.12.26.521940 (PMC9810232; doi:10.1101/2022.12.26.521940), 2022-12-27
Supplement: NIHPP2022.12.26.521940V1-supplement-1.pdf [file NIHPP2022.12.26.521940V1-supplement-1.pdf]

627  
628

## Supplemental Information

629 **Title: ESCRT recruitment to mRNA-encoded SARS-CoV-2 spike induces virus-**  
630 **like particles and enhanced antibody responses**

631

632 **Authors:** Magnus A. G. Hoffmann<sup>1\*</sup>, Zhi Yang<sup>1‡</sup>, Kathryn E. Huey-Tubman<sup>1</sup>,  
633 Alexander A. Cohen<sup>1</sup>, Priyanthi N. P. Gnanapragasam<sup>1</sup>, Leesa M. Nakatomi<sup>1</sup>, Kaya  
634 N. Storm<sup>1</sup>, Woohyun J. Moon<sup>2</sup>, Paulo J.C. Lin<sup>2</sup>, Pamela J. Bjorkman<sup>1\*</sup>

635

### 636 **Affiliations:**

637 <sup>1</sup>Division of Biology and Biological Engineering, California Institute of Technology,  
638 Pasadena, CA 91125, USA

639 <sup>2</sup>Acuitas Therapeutics, Vancouver, BC, V6T 1Z3, CANADA

640 <sup>‡</sup>Present address: Department of Molecular and Cell Biology, University of California,  
641 Berkeley, CA 94720, USA

642

643 \*To whom correspondence should be addressed: Email: [mhoffman@caltech.edu](mailto:mhoffman@caltech.edu),  
644 [bjorkman@caltech.edu](mailto:bjorkman@caltech.edu)

645

646

## 647 **Methods**

### 648 **Design of EABR constructs**

649 The EABR domain (residues 160-217) of the human CEP55 protein was fused to the  
650 C-terminus of the SARS-CoV-2 S protein (WA1/D614G) separated by a 4-residue  
651 (Gly)<sub>3</sub>Ser (GS) linker to generate S-EABR/no EPM. This construct contained the native  
652 furin cleavage site, 2P stabilizing mutations (Pallesen et al., 2017), and the C-terminal  
653 21 residues were truncated to remove an ER-retention signal (McBride et al., 2007).  
654 The S-EABR construct was generated by inserting residues 243-290 of mouse FcγRII-  
655 B1 upstream of the 4-residue GS linker and the EABR domain. The S-EABR<sub>min1</sub> and  
656 S-EABR<sub>min2</sub> constructs encoded residues 170-217 and 170-208 of CEP55,  
657 respectively. EABR constructs were also generated for HIV-1 Env<sub>YU2</sub> and human  
658 CCR5. S-p6, S-VP40<sub>1-44</sub>, and S-p9 were generated by replacing the EABR domain  
659 gene with sequences encoding HIV-1 p6 (isolate HXB2), EBOV VP40 (residues 1-44;  
660 Zaire EBOV), and EIAV p9 (strain Wyoming), respectively. The S-ferritin construct was  
661 designed as described (Powell et al., 2021) by fusing genes encoding the ectodomain  
662 of SARS-CoV-2 S WA1/D614G containing a furin cleavage site and 2P mutations, and  
663 *Helicobacter pylori* ferritin, separated by a 3-residue Ser-Gly-Gly linker. All constructs  
664 were cloned into the p3bNC expression plasmid.

665

### 666 **Production of EABR eVLPs**

667 EABR eVLPs were generated by transfecting Expi293F cells (Gibco) cultured in  
668 Expi293F expression media (Gibco) on an orbital shaker at 37°C and 8% CO<sub>2</sub>. Gag-  
669 based eVLPs were produced by co-transfecting Expi293F cells with a plasmid  
670 expressing Rev-independent HIV-1 Gag-Pol (pHDM-Hgpm2 plasmid; PlasmID  
671 Repository, Harvard Medical School) and SARS-CoV-2 S, HIV-1 Env<sub>YU2</sub>, or CCR5,

672 respectively, at a ratio of 1:1. SARS-CoV-2 M/N/E-based eVLPs were produced by  
673 co-transfecting Expi293F cells with plasmids expressing the SARS-CoV-2 M, N, E,  
674 and S proteins at a ratio of 1:1:1:1. To enable interactions between M, N, E, and S,  
675 we transfected full-length S with an untruncated cytoplasmic domain. 72 hours post-  
676 transfection, cells were centrifuged at 400 x g for 10 min, supernatants were passed  
677 through a 0.45 µm syringe filter and concentrated using Amicon Ultra-15 centrifugal  
678 filters with 100 kDa molecular weight cut-off (Millipore). eVLPs were purified by  
679 ultracentrifugation at 50,000 rpm (135,000 x g) for 2 hours at 4°C using a TLA100.3  
680 rotor and a Optima™ TLX ultracentrifuge (Beckman Coulter) on a 20% w/v sucrose  
681 cushion. Supernatants were removed and pellets were re-suspended in 200 µL sterile  
682 PBS at 4°C overnight. To remove residual cell debris, samples were centrifuged at  
683 10,000 x g for 10 min and supernatants were collected. For in vivo studies and cryo-  
684 ET, eVLPs were further purified by SEC using a Superose 6 10/300 column (GE  
685 Healthcare) equilibrated with PBS. Peak fractions corresponding to S-EABR eVLPs  
686 were combined and concentrated to 250-500 µL in Amicon Ultra-4 centrifugal filters  
687 with 100 kDa molecular weight cut-off. Samples were aliquoted and stored at -20°C.  
688

## 689 **Protein expression**

690 Soluble SARS-CoV-2 S-6P trimers (WA1/D614G) (Hsieh et al., 2020) and RBDs were  
691 expressed as described (Cohen et al., 2022; Wang et al., 2022). Briefly, Avi/His-  
692 tagged proteins were purified from transiently-transfected Expi293F cells (Gibco) by  
693 nickel affinity chromatography and SEC (Barnes et al., 2020; Cohen et al., 2022; Wang  
694 et al., 2022). Peak fractions corresponding to S-6P or RBD proteins were pooled,  
695 concentrated, and stored at 4°C. Biotinylated proteins for ELISAs were generated by  
696 co-transfection of Avi/His-tagged S-6P and RBD constructs with a plasmid encoding

697 an endoplasmic reticulum-directed BirA enzyme (kind gift from Michael Anaya,  
698 Caltech). S-6P constructs with a C-terminal SpyTag003 tag (Keeble et al., 2019) were  
699 expressed for covalent coupling to a 60-mer protein nanoparticle (SpyCatcher003-  
700 mi3) using the SpyCatcher-SpyTag system (Brune et al., 2016; Zakeri et al., 2012).

701

## 702 **Preparation of SpyCatcher003-mi3 nanoparticles**

703 SpyCatcher003-mi3 (Cohen et al., 2021) displaying SpyTagged SARS-CoV-2 S-6P  
704 trimers were prepared as described (Cohen et al., 2021; Cohen et al., 2022). Briefly,  
705 SpyCatcher003-mi3 subunits with N-terminal 6xHis tags were expressed in BL21  
706 (DE3)-RIPL *E. coli* (Agilent). Bacterial cell pellets were lysed using a cell disruptor in  
707 the presence of 2.0 mM PMSF (Sigma). Lysates were centrifuged at 21,000 x g for 30  
708 min, and supernatants were collected and filtered through a 0.2 µm filter.  
709 SpyCatcher003-mi3 was purified by Ni-NTA chromatography using a pre-packed  
710 HisTrap™ HP column (GE Healthcare), concentrated in Amicon Ultra-15 centrifugal  
711 filters with 30 kDa molecular weight cut-off (Millipore), and purified by SEC on a HiLoad  
712 16/600 Superdex 200 column (GE Healthcare) equilibrated with TBS. S-mi3  
713 nanoparticles were generated by incubating purified SpyCatcher003-mi3 with a 3-fold  
714 molar excess of purified SpyTagged S-6P trimer overnight at 4°C in TBS. Conjugated  
715 S-mi3 nanoparticles were separated from uncoupled S-6P trimers by SEC using a  
716 Superose 6 10/300 column (GE Healthcare) equilibrated with PBS. Fractions  
717 corresponding to conjugated S-mi3 were identified by sodium dodecyl sulfate  
718 polyacrylamide gel electrophoresis (SDS-PAGE) and pooled.

719

720

721

722 **Western blot analysis**

723 The presence of SARS-CoV-2 S, HIV-1 Env<sub>VYU2</sub>, and CCR5 on purified eVLPs was  
724 detected by Western blot analysis. Samples were diluted in SDS-PAGE loading buffer  
725 under reducing conditions, separated by SDS-PAGE, and transferred to nitrocellulose  
726 membranes (0.2 µm) (GE Healthcare). The following antibodies were used for  
727 detecting SARS-CoV-2 S, HIV-1 Env<sub>VYU2</sub>, and CCR5: rabbit anti-SARS-CoV-2 S1  
728 protein (PA5-81795; ThermoFisher) at 1:2,500, the human anti-HIV-1 Env broadly  
729 neutralizing antibody 10-1074 (Mouquet et al., 2012) (expressed in-house) at  
730 1:10,000, rat anti-CCR5 (ab111300; Abcam) at 1:2,000, HRP-conjugated mouse anti-  
731 rabbit IgG (211-032-171; Jackson ImmunoResearch) at 1:10,000, HRP-conjugated  
732 goat anti-human IgG (2014-05; Southern Biotech) at 1:8,000, and HRP-conjugated  
733 mouse anti-rat IgG (3065-05; Southern Biotech) at 1:10,000. Protein bands were  
734 visualized using ECL Prime Western Blotting Detection Reagent (GE Healthcare).

735

736 For in vivo studies, the amount of SARS-CoV-2 S on S-EABR eVLPs was determined  
737 by quantitative Western blot analysis. Various dilutions of SEC-purified S-EABR eVLP  
738 samples and known amounts of soluble SARS-CoV-2 S1 protein (Sino Biological)  
739 were separated by SDS-PAGE and transferred to nitrocellulose membranes (GE  
740 Healthcare). SARS-CoV-2 S was detected as described above. Band intensities of the  
741 SARS-CoV-2 S1 standards and S-EABR eVLP sample dilutions were measured using  
742 ImageJ to determine S concentrations. The S1 protein concentrations determined for  
743 S-EABR samples were multiplied by a factor of 1.8 to account for the difference in  
744 molecular weight between S1 and the full-length S protein.

745

746

## 747 **Cryo-ET of S-EABR eVLPs**

748 SEC-purified S-EABR eVLPs were prepared on grids for cryo-ET using a Mark IV  
749 Vitrobot (ThermoFisher Scientific) operated at 21°C and 100% humidity. 2.5 µL of  
750 sample was mixed with 0.4 µL of 10 nm fiducial gold beads (Sigma-Aldrich) and  
751 applied to 300-mesh Quantifoil R2/2 grids, blotted for 3.5 s, and then plunge-frozen in  
752 liquid ethane cooled by liquid nitrogen. Image collections were performed on a 300 kV  
753 Titan Krios transmission electron microscope (ThermoFisher Scientific) operating at a  
754 nominal 42,000x magnification. Tilt series were collected on a K3 direct electron  
755 detector (Gatan) with a pixel size of 2.15 Å•pixel<sup>-1</sup> using SerialEM software  
756 (Mastronarde, 2005). The defocus range was set to -5 to -8 µm and a total of 120 e<sup>-</sup> •  
757 Å<sup>-2</sup> per tilt series. Images were collected using a dose-symmetric scheme (Hagen et  
758 al., 2017) ranging from -60° to 60° with 3° intervals. Tomograms were aligned and  
759 reconstructed using IMOD (Mastronarde and Held, 2017).

760

761 To build a model of an S-EABR eVLP, coordinates of a SARS-CoV-2 S trimer (PDB  
762 6VXX) were fit into spike densities in the reconstructed tomograms using ChimeraX  
763 (Goddard et al., 2018). Positions and orientations of the S protein were adjusted in a  
764 hemisphere of the eVLP in which the spike density was of higher quality. A 55 nm  
765 sphere was adapted from a cellPACK model (cellPACK ID: HIV-1\_0.1.6\_6) (Johnson  
766 et al., 2015; Johnson et al., 2014) and added to the model to represent the eVLP  
767 membrane surface.

768

## 769 **Neutralization assays**

770 Lentivirus-based SARS-CoV-2 pseudoviruses were generated as described  
771 (Crawford et al., 2020; Robbiani et al., 2020) using S proteins from the WA1/D614G,

772 Delta, Omicron BA.1, Omicron BA.2, and Omicron BA.4/5 variants in which the C-  
773 terminal 21 residues of the S protein cytoplasmic tails were removed (Crawford et al.,  
774 2020). Serum samples from immunized mice were heat-inactivated for 30 min at 56°C.  
775 Three-fold serial dilutions of heat-inactivated samples were incubated with  
776 pseudoviruses for 1 hour at 37°C, followed by addition of the serum-virus mixtures to  
777 pre-seeded HEK293T-ACE2 target cells. After 48-hour incubation at 37°C, BriteLite  
778 Plus substrate (Perkin Elmer) was added and luminescence was measured. Half-  
779 maximal inhibitory dilutions (ID<sub>50</sub>S) were calculated using 4-parameter non-linear  
780 regression analysis in AntibodyDatabase (West et al., 2013) and ID<sub>50</sub> values were  
781 rounded to three significant figures.

782

783 PRNT<sub>50</sub> (50% plaque reduction neutralization test) assays with authentic SARS-CoV-  
784 2 virus were performed in a biosafety level 3 facility at BIOQUAL, Inc. (Rockville, MD)  
785 as described (Haun et al., 2020). Mouse sera from day 56 post-immunization were  
786 diluted 1:20 and then 3-fold serially diluted in culture media (DMEM + 10% FBS +  
787 Gentamicin). The diluted samples were incubated with 30 plaque-forming units of wild-  
788 type SARS-CoV-2 (USA-WA1/2020, BEI Resources NR-52281; Beta variant, Isolate  
789 hCoV-19/South Africa/KRISP-K005325/2020, BEI Resources NR-54009; Delta  
790 variant, isolate hCoV-19/USA/MD-HP05647/2021 BEI Resources NR-55674) for 1  
791 hour at 37°C. Samples were then added to a confluent monolayer of Vero/TMPRSS2  
792 cells in 24-well plates for 1 hour at 37°C in 5% CO<sub>2</sub>. 1 mL of culture media with 0.5%  
793 methylcellulose was added to each well and plates were incubated for 3 days at 37°C  
794 in 5% CO<sub>2</sub>. Plates were fixed with ice cold methanol at -20°C for 30 min. Methanol  
795 was discarded and plates were stained with 0.2% crystal violet for 30 min at room  
796 temperature. Plates were washed once with water and plaques in each well were

797 counted. TCID<sub>50</sub> values were calculated using the Reed-Muench formula (Reed and  
798 Muench, 1938).

799

## 800 **ELISAs**

801 Pre-blocked streptavidin-coated Nunc® MaxiSorp™ 384-well plates (Sigma) were  
802 coated with 5 µg/mL biotinylated S-6P or RBD proteins in Tris-buffered saline with  
803 0.1% Tween 20 (TBS-T) and 3% bovine serum albumin (BSA) for 1 hour at room  
804 temperature. Serum samples from immunized mice were diluted 1:100, 4-fold serially  
805 diluted in TBS-T/3% BSA, and then added to plates. After a 3-hour incubation at room  
806 temperature, plates were washed with TBS-T using an automated plate washer. HRP-  
807 conjugated goat anti-mouse IgG (715-035-150; Jackson ImmunoResearch) was  
808 diluted 1:100,000 in TBS-T/3% BSA and added to plates for 1 hour at room  
809 temperature. After washing with TBS-T, plates were developed using SuperSignal™  
810 ELISA Femto Maximal Signal Substrate (ThermoFisher) and absorbance was  
811 measured at 425 nm. Area under the curve (AUC) calculations for binding curves were  
812 performed using GraphPad Prism 9.3.1 assuming a one-site binding model with a Hill  
813 coefficient as described (Cohen et al., 2021).

814

## 815 **mRNA synthesis**

816 Codon-optimized mRNAs encoding SARS-CoV-2 S, S-EPM, S-EABR/no EPM, and  
817 S-EABR constructs were synthesized by RNAcore  
818 (<https://www.houstonmethodist.org/research-cores/rnacore/>) using proprietary  
819 manufacturing protocols. mRNAs were generated by T7 RNA polymerase-mediated  
820 in vitro transcription reactions using DNA templates containing the immunogen open  
821 reading frame flanked by 5' untranslated region (UTR) and 3' UTR sequences and



822 terminated by an encoded polyA tail. CleanCap 5' cap structures (TriLink) were  
823 incorporated into the 5' end co-transcriptionally. Uridine was completely replaced with  
824 N1-methyl-pseudouridine to reduce immunogenicity (Kariko et al., 2008). mRNAs  
825 were purified by oligo-dT affinity purification and high-performance liquid  
826 chromatography (HPLC) to remove double-stranded RNA contaminants (Kariko et al.,  
827 2011). Purified mRNAs were stored at  $-80^{\circ}\text{C}$ .

828

### 829 **mRNA transfections**

830 For mRNA transfections,  $10^6$  HEK293T cells were seeded in 6-well plates. After 24  
831 hours, cells were transfected with 2  $\mu\text{g}$  mRNA encoding SARS-CoV-2 S, S-EPM, S-  
832 EABR/no EPM, or S-EABR constructs using Lipofectamine<sup>TM</sup> MessengerMax<sup>TM</sup>  
833 transfection reagent (ThermoFisher). 48 hours post-transfection, supernatants were  
834 collected and purified for Western blot analysis. Cells were gently detached by  
835 pipetting and resuspended in 500  $\mu\text{L}$  PBS. 100  $\mu\text{L}$  were transferred into Eppendorf  
836 tubes for flow cytometry analysis of S cell surface expression. Cells were stained with  
837 the SARS-CoV-2 antibody C119 (Robbiani et al., 2020) at 5  $\mu\text{g}/\text{mL}$  in PBS+ (PBS  
838 supplemented with 2% FBS) for 30 min at room temperature in the dark. After two  
839 washes in PBS+, samples were stained with an Alexa Fluor<sup>®</sup> 647-conjugated anti-  
840 human IgG secondary antibody (A21445; Life Technologies) at a 1:2,000 dilution in  
841 PBS+ for 30 min at room temperature in the dark. After two washes in PBS+, cells  
842 were resuspended in PBS+ and analyzed by flow cytometry (MACSQuant, Miltenyi  
843 Biotec). Results were plotted using FlowJo 10.5.3 software.

844

845

846

847 **LNP encapsulation of mRNAs**

848 Purified N1-methyl-pseudouridine mRNA was formulated in LNP as previously  
849 described (Pardi et al., 2015). In brief, 1,2-distearoyl-*sn*-glycero-3-phosphocholine,  
850 cholesterol, a PEG lipid, and an ionizable cationic lipid dissolved in ethanol were  
851 rapidly mixed with an aqueous acidic solution containing mRNA using an in-line mixer.  
852 The ionizable lipid and LNP composition are described in the international patent  
853 application WO2017075531(2017). The post in-line solution was dialyzed with PBS  
854 to remove the ethanol and displace the acidic solution. Subsequently, LNP was  
855 measured for size (60-65 nm) and polydispersity (PDI < 0.075) by dynamic light  
856 scattering (Malvern Nano ZS Zetasizer). Encapsulation efficiencies were >97% as  
857 measured by the Quant-iT Ribogreen Assay (Life Technologies).

858

859 **Immunizations**

860 All animal procedures were performed in accordance with IACUC-approved protocols.  
861 7-8 week-old female C57BL/6 or BALB/c mice (Charles River Laboratories) were used  
862 for immunization experiments with cohorts of 8-10 animals per group. 0.1 µg of protein-  
863 based immunogens, including soluble S trimer, S-mi3, and purified S-EABR eVLPs,  
864 were administered to C57BL/6 mice by subcutaneous (SC) injections on days 0 and  
865 28 in the presence of Sigma adjuvant system (Sigma). 2 µg of S and S-EABR mRNA-  
866 LNP were administered to BALB/c mice by intramuscular (IM) injections on days 0 and  
867 28. To compare mRNA- and protein-based immunogens, 1 µg purified S-EABR eVLPs  
868 were administered IM in the presence of 50% v/v AddaVax™ adjuvant (Invivogen).  
869 Serum samples for ELISAs and neutralization assays were obtained on indicated  
870 days.

871

## 872 **ELISpot assays**

873 Animals were euthanized on day 112 and spleens were collected. Spleens were  
874 homogenized using a gentleMACS Octo Dissociator (Miltenyi Biotec). Cells were  
875 passed through a 70  $\mu\text{m}$  tissue screen, centrifuged at 1,500 rpm for 10 min, and  
876 resuspended in CTL-Test<sup>TM</sup> media (ImmunoSpot) containing 1% GlutaMAX<sup>TM</sup> (Gibco)  
877 for ELISpot analysis to evaluate T cell responses. A PepMix<sup>TM</sup> pool of 315 peptides  
878 (15-mers with 11 amino acid overlap) derived from the SARS-CoV-2 S protein (JPT  
879 Peptide Technologies) was added to mouse IFN-g/IL-4 double-color ELISpot plates  
880 (ImmunoSpot) at a concentration of 2  $\mu\text{g}/\text{mL}$ . 300,000 cells were added per well, and  
881 plates were incubated at 37°C for 24 hours. Biotinylated detection, streptavidin-  
882 alkaline phosphatase (AP), and substrate solutions were added according to the  
883 manufacturer's guidelines. Plates were gently rinsed with water three times to stop the  
884 reactions. Plates were air-dried for two hours in a running laminar flow hood. The  
885 number of spots and the mean spot sizes were quantified using a CTL ImmunoSpot  
886 S6 Universal-V Analyzer (ImmunoSpot).

887

## 888 **Statistical analysis**

889 Titer differences between immunized groups of mice for ELISAs and neutralization  
890 assays were evaluated for statistical significance using the non-parametric Kruskal-  
891 Wallis test followed by Dunn's multiple comparison post hoc test calculated using  
892 Graphpad Prism 9.3.1. For ELISpot results, statistically significant differences  
893 between immunized groups of mice were determined using analysis of variance  
894 (ANOVA) test followed by Tukey's multiple comparison post hoc test calculated using  
895 Graphpad Prism 9.3.1.

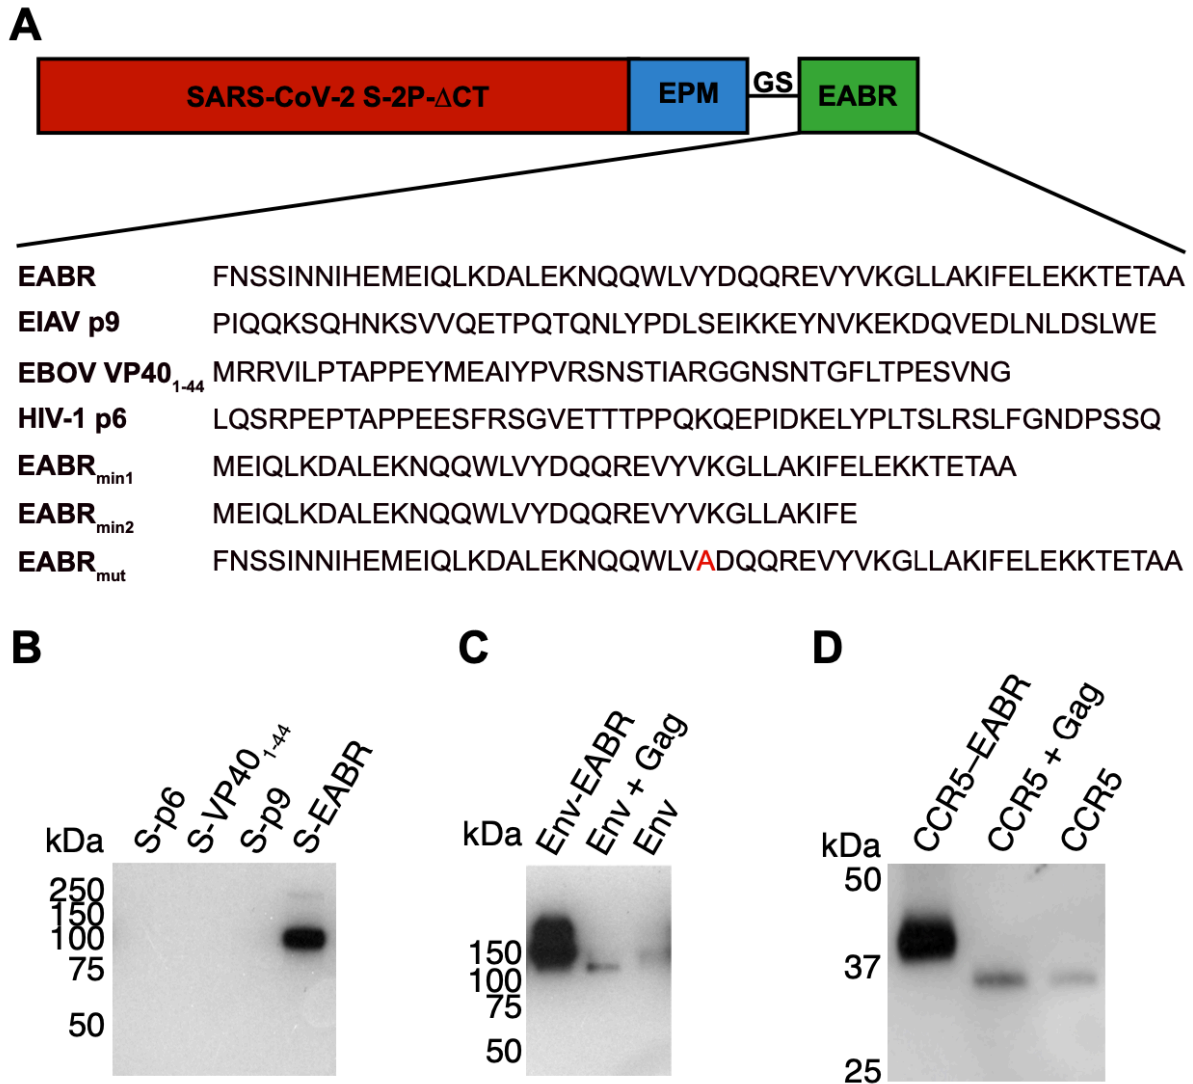

896

897

**Figure S1 Comparison of EABR-related sequence insertions in the cytoplasmic tail of SARS-CoV-2 S, related to Figure 1.**

898

899 (A) Top: Schematic of different S-EABR constructs that were compared for their ability

900 to induce eVLP assembly. EPM = Endocytosis prevention motif. GS = (Gly)<sub>3</sub>Ser linker.

901 EABR = ESCRT- and ALIX-binding region. Bottom: Amino acid sequences of EABR

902 portion of different constructs.

903

904 (B) Western blot analysis of SARS-CoV-2 S1 protein levels on eVLPs purified by

905 ultracentrifugation on a 20% sucrose cushion from transfected Expi293F cell culture

906 supernatants. Cells were transfected with S-p6, S-VP40<sub>1-44</sub>, S-p9, or S-EABR  
907 constructs. Purified eVLP samples were diluted 1:400.

908

909 (C) Western blot analysis comparing HIV-1 Env<sub>YU2</sub> levels in eVLP samples purified  
910 from transfected Expi293F cell culture supernatants. Cells were transfected with  
911 plasmids encoding Env-EABR, Env plus HIV-1 Gag, or Env alone. Purified eVLP  
912 samples were diluted 1:200.

913

914 (D) Western blot analysis comparing CCR5 levels in eVLP samples purified from  
915 transfected Expi293F cell culture supernatants. Cells were transfected with plasmids  
916 encoding CCR5-EABR, CCR5 plus HIV-1 Gag, or CCR5 alone. Purified eVLP  
917 samples were diluted 1:200. The migration difference between CCR5-EABR and  
918 CCR5 is due to addition of the EABR sequence (~7 kDa) that increases its molecular  
919 mass.

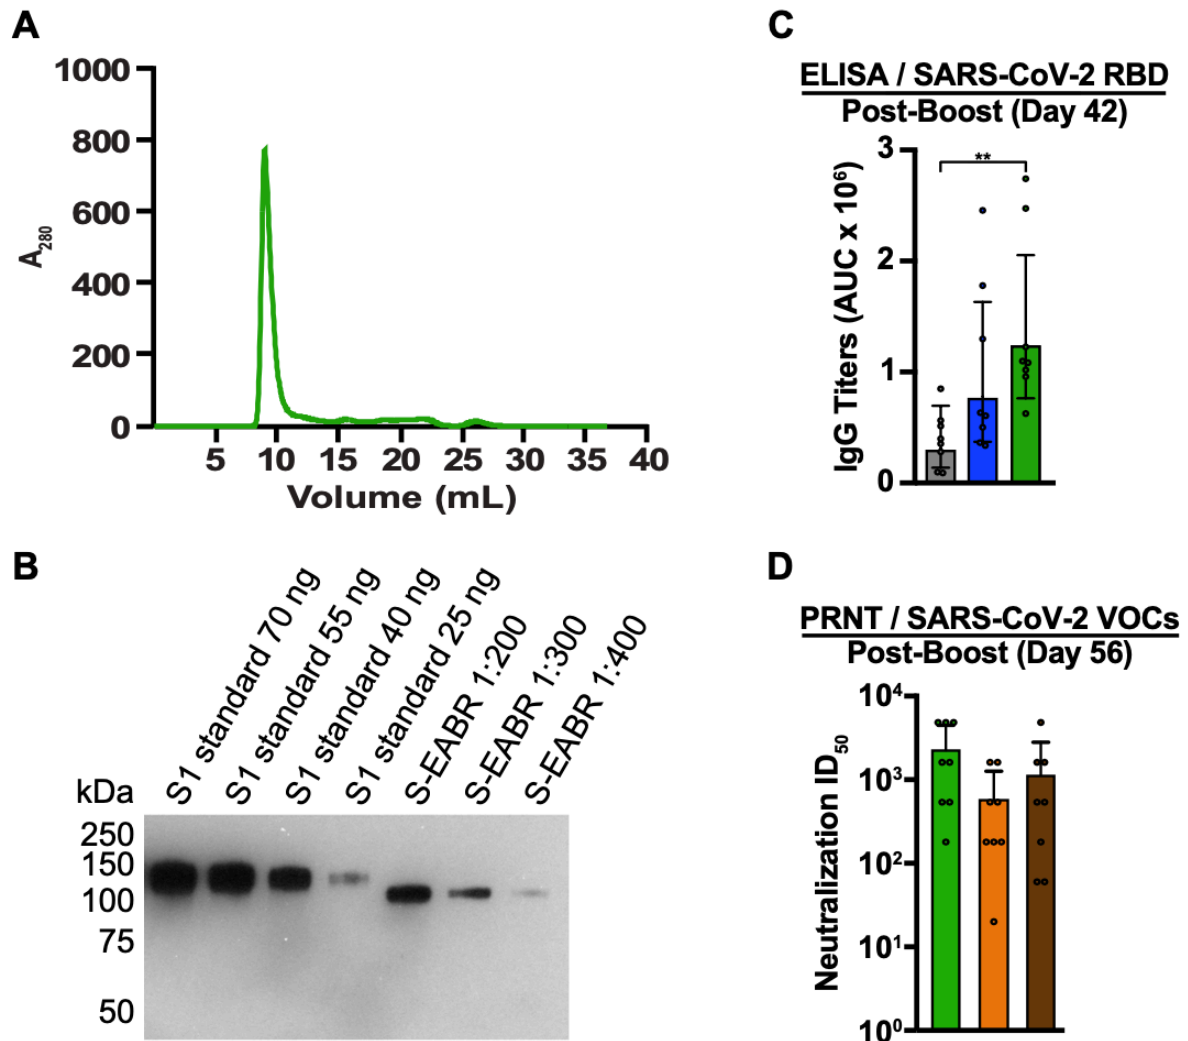

920  
921 **Figure S2 Purified S-EABR eVLPs induce potent antibody responses in mice,**  
922 **related to Figure 2.**

923 (A) Size exclusion chromatogram of S-EABR eVLPs purified by ultracentrifugation on  
924 a 20% sucrose cushion.

925

926 (B) Quantitative Western blot comparing indicated amounts of SARS-CoV-2 S1  
927 standards (lanes 1-4) and various dilutions of purified S-EABR eVLPs (lanes 5-7) to  
928 determine S protein concentrations in eVLP samples. The S1 standard protein (Sino  
929 Biological) was biotinylated and contained a polyhistidine tag, which resulted in a  
930 difference in apparent molecular weights for the S1 standards and the S-EABR

931 construct. Band intensities of S1 standards and S-EABR eVLP sample dilutions were  
932 measured using ImageJ to determine S concentrations.

933

934 (C) ELISA data from day 42 for antisera from individual mice (colored circles)  
935 immunized with soluble S (purified S trimer) (gray), S-mi3 (S trimer ectodomains  
936 covalently attached to mi3, a 60-mer protein nanoparticle) (blue), or S-EABR eVLPs  
937 (green). Results are shown as area under the curve (AUC) and presented as the  
938 geometric mean (bars) and standard deviation (horizontal lines). Significant  
939 differences between cohorts linked by horizontal lines are indicated by asterisks:  
940  $p < 0.05 = *$ ,  $p < 0.01 = **$ .

941

942 (D) PRNT assay results from day 56 for antisera from individual mice (colored circles)  
943 immunized with S-EABR eVLPs. Results against the SARS-CoV-2 WA1 (green), Beta  
944 (orange), and Delta (brown) variants are shown as TCID<sub>50</sub> values (Reed and Muench,  
945 1938) and presented as the geometric mean (bars) and standard deviation (horizontal  
946 lines).

947

948

949

950

951
